# Supplementary material
Source: PubMed Central journal article supplement (PMC4773896)
Supplement: NIHMS625382-supplement-ESM_Fig2.pdf [file NIHMS625382-supplement-ESM_Fig2.pdf]

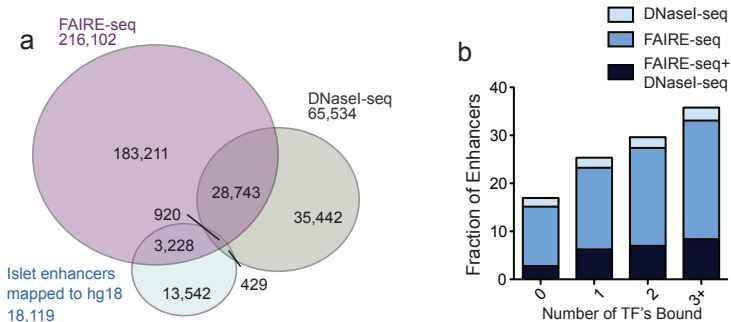

**ESM Fig. 2** Enhancers are conserved between mice and humans. **(a)** Venn diagram showing the proportion of loci shared between the identified poised enhancers mapped to hg18, and open chromatin in human islets identified by FAIRE-seq or DNaseI-seq. **(b)** The fraction of poised enhancers identified as within open chromatin in human islets by FAIRE-seq and/or DNaseI-seq as a function of the number of co-occupying transcription factors at the enhancers in mice
