# Supplementary material
Source: PubMed Central journal article supplement (PMC4773896)
Supplement: NIHMS625382-supplement-ESM_Fig4.pdf [file NIHMS625382-supplement-ESM_Fig4.pdf]

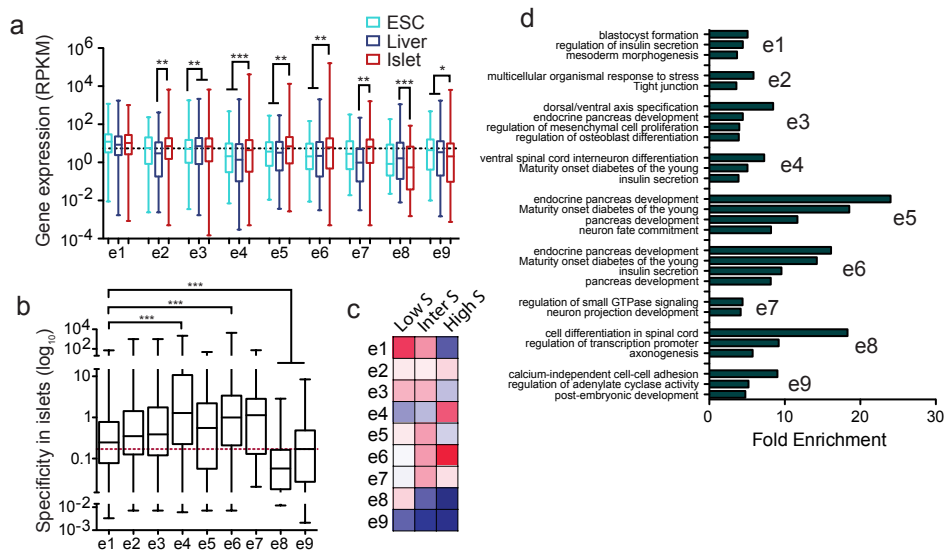

**ESM Fig. 4** Expression, specificity and GO/KEGG enrichment of genes with an associated identified enhancer. Enhancers were associated with the nearest gene within +/- 100 kb. **(a)** Box-whisker plot of gene expression levels in ESCs (light blue), Liver (dark blue), and in Islets (red) for genes associated with the indicated enhancer clusters. **(b)** Box-whisker plot of specificity to islets as compared to 203 other mouse SAGE libraries for genes associated with the indicated enhancer clusters. **(c)** Heatmap of the enrichment (darker blue is more deprived, and darker red is more enriched) of genes with low, intermediate or high specificity (S) to islets associated with enhancers in each cluster, relative to random expectation. **(d)** Fold enrichment of significantly enriched GO and KEGG terms associated with genes with enhancers in the indicated clusters. Statistically significant differences were detected using a Kruskal-Wallis non-parametric test with a Dunn's multiple comparison correction, \*  $p < 0.05$ , \*\*  $p < 0.01$ , \*\*\*  $p < 0.001$
