# Supplementary material
Source: PubMed Central journal article supplement (PMC4773896)
Supplement: NIHMS625382-supplement-ESM_Fig5.pdf [file NIHMS625382-supplement-ESM_Fig5.pdf]

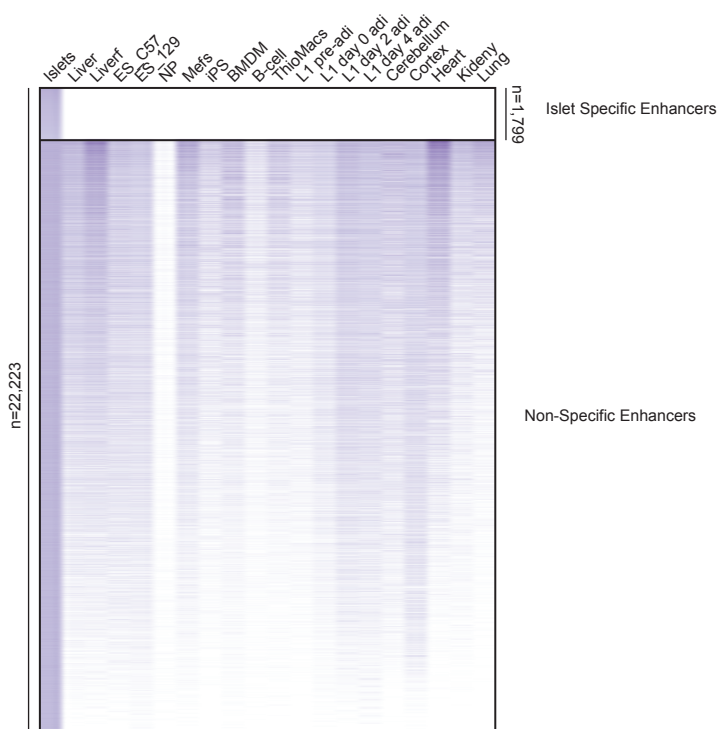

**ESM Fig. 5** Heatmap of the total read counts in +/- kb regions around enhancer midpoints for H3K4me1 in 19 different tissues and islets. The data are segregated into Islet-Specific and Non-Specific Enhancers. ESC (129), ESCs from 129JAE-C57/B6 mice. L1 day 4 adi, 3T3-L1 cells 4 days after induction of adipogenesis. Liverf, Liver from 4f2a mice. L1 day 2 adi, 3T3-L1 cells 2 days after induction of adipogenesis. Mefs, mouse embryonic fibroblasts. ESC (c57), ESCs from C57/B6 inbred mice. L1 day 0 adi, 3T3-L1 cells on the day of induction of adipogenesis. Bmdm, bone marrow derived macrophages. Thiomacs, thioglycollate-elicited peritoneal macrophages. L1 pre-adi, 3T3-L1 cells 2 days before induction of adipogenesis. iPS, induced pluripotent stem cells. Bcells, resting splenic B cells. Neural prog, ESC-derived neural progenitors. Note that the 1,799 islet specific enhancers only have H3K4me1 marked nucleosomes in the islet library
