# Supplementary material
Source: PubMed Central journal article supplement (PMC4773896)
Supplement: NIHMS625382-supplement-ESM_Fig6.pdf [file NIHMS625382-supplement-ESM_Fig6.pdf]

LH0501.mx.4.461429e  
 DEX01.mx.1.653991e  
 LH0302.mx.4.049189e  
 POU2B01.mx.1.270003  
 OT101.mx.2.863155e  
 HOXC501.mx.4.068474  
 HOXC401.mx.1.862658  
 HOXB801.mx.9.1303760  
 PAX602.mx.1.382375e  
 OCTAMER02.mx.1.51210  
 NK06103.mx.4.170702  
 NK06301.mx.7.451878  
 LH0301.mx.1.032720e  
 HES401.mx.3.022167e  
 PIT101.mx.1.380216e  
 TST102.mx.3.001052e  
 BRN401.mx.6.545705e  
 HOXA401.mx.3.622210  
 LM101.mx.8.126424e  
 LMX101.mx.5.544256e  
 ISL201.mx.7.454233e  
 ALX402.mx.8.205955e  
 SPOCK201.mx.1.517000  
 PAX701.mx.1.507109e  
 VESX101.mx.1.788123e  
 CART103.mx.2.678843  
 HOXB401.mx.4.963158  
 PRCP102.mx.5.678831  
 BARX0201.mx.2.451512  
 MSX102.mx.2.968167e  
 NK06102.mx.3.911561  
 KC201.mx.1.786291e  
 NK05201.mx.7.222983  
 HMX0202.mx.4.167159e  
 HNF102.mx.2019340e  
 HOXB801.mx.8.132967  
 DRH101.mx.1.126889e  
 CS201.mx.1.253934e  
 NK05202.mx.1.258110  
 BARH4.201.mx.2.757169  
 BARH1.101.mx.1.811217  
 MSX301.mx.5.680169e  
 PEX101.mx.1.463152e  
 POU1F106.mx.1.234933  
 POU5F201.mx.3.378777  
 OTX01.mx.6.074928e  
 POU5F101.mx.4.861801  
 PAX402.mx.2.812589e  
 NK06202.mx.9.375960  
 HNF103.mx.3.188046e  
 HNF106.mx.2.63554e  
 HNF101.mx.8.285104e  
 HNF10201.mx.2.1430  
 HOXA201.mx.3.370753  
 HOXB501.mx.3.351955  
 HOXA601.mx.8.895174  
 VAX101.mx.2.178876e  
 HOXD301.mx.7.435316  
 BSX01.mx.3.286933e  
 MOX101.mx.3.965447e  
 DLX201.mx.2.029267e  
 NKX201.mx.2.515615e  
 BARX101.mx.2.150120  
 HOXA402.mx.1.187015  
 OCT108.mx.4.254033e  
 HOXC801.mx.9.443792  
 HDX1302.mx.3.444271  
 IPF106.mx.5.958763e  
 HOXB301.mx.5.122016  
 GSP201.mx.8.155162e  
 HOXD101.mx.1.338472  
 EN102.mx.6.411967e  
 PAX405.mx.7.461297e  
 LIT01.mx.2.046959e  
 ALX301.mx.6.837684e  
 ESX101.mx.9.644658e  
 SPO202.mx.2.488596e-1  
 EMOX201.mx.3.019446e  
 EVX101.mx.4.160027e  
 IPF108.mx.4.820317e  
 IPF105.mx.1.288967e  
 IPF104.mx.3.634462e  
 BRN601.mx.4.978497  
 POU5F102.mx.5.52305  
 POU5F103.mx.7.45187  
 IPF10401.mx.6.85640  
 IPF102.mx.2.378672e  
 HMGY101.mx.3.305003  
 HMGY102.mx.1.052215  
 RORA201.mx.3.628017  
 NK03A02.mx.1.283007  
 NK03B01.mx.2.143201  
 GATA202.mx.6.700981  
 GATA106.mx.6.970279  
 GATA302.mx.1.192165  
 GATA105.mx.2.310250  
 ZNF3301.mx.2.52972  
 FOXO202.mx.7.049427  
 HOXA1301.mx.2.54531  
 HOXA1302.mx.2.398403  
 CUX202.mx.6.49309e  
 HOXB901.mx.3.062603  
 HOXA1001.mx.5.26887  
 CUX101.mx.4.634869e  
 CDX201.mx.3.556569e  
 NFAT106.mx.1.813409  
 HMGY106.mx.5.247493  
 HELIOSA02.mx.2.3274  
 NFAT06.mx.8.061768e  
 NFAT05.mx.3.103020  
 OCT1B.mx.3.036067e  
 OCT101.mx.3.670498e  
 RSRP0401.mx.4.80165  
 MEF203.mx.1.299047e  
 RSRP0402.mx.8.16378  
 TPBP01.mx.7.426950e  
 MMEF206.mx.2.394113  
 AMEF206.mx.3.846971  
 SOX101.mx.6.101397  
 SOX501.mx.6.663028e  
 SOX401.mx.4.203424e  
 SRY01.mx.2.789494e  
 FOXO102.mx.4.882812  
 FOXO301.mx.3.703705  
 FREAC201.mx.1.862165  
 HNF3A01.mx.5.915353  
 FREAC401.mx.1.15265  
 HNF3B01.mx.7.1502  
 HNF3D6.mx.6.932698e  
 HNF3ALPHA06.mx.3.01  
 HNF401.mx.7.139272e  
 HNF3B01.mx.2.750516  
 FOX02.mx.1.794227e  
 FOXO301.mx.4.31039  
 FOXF301.mx.1.030380  
 FREAC701.mx.3.15073  
 HNF901.mx.1.943309e  
 FREAC301.mx.3.65952  
 FOXJ201.mx.2.279155  
 HNF901.mx.1.042956e  
 CPHX01.mx.1.596581e  
 HDX01.mx.1.991973e  
 HNF9D6.mx.6.501543e  
 RFX101.mx.1.342250e  
 IPF0601.mx.7.20370  
 TAL1BETAHE1701.mx.6  
 TAL1BETAHE1701.mx.7  
 E1206.mx.4.06296e  
 NEUROD01.mx.7.46203

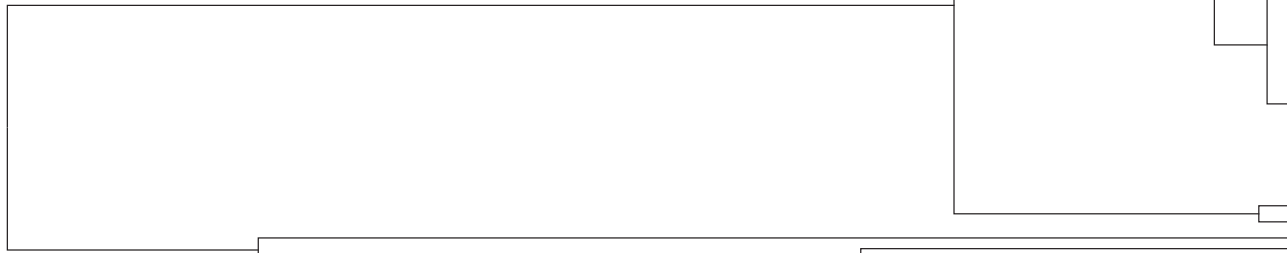

**ESM Fig. 6** Phylogram of transcription factor binding matrix similarities for ISE enriched motifs. Matrices of ISE enriched motifs were analysed using STAMP. Matrix similarities are represented by clustering into distinct families with horizontal line length indicating relative similarity between individual matrices and matrix families
