# Supplementary material
Source: PubMed Central journal article supplement (PMC4773896)
Supplement: NIHMS625382-supplement-ESM_Fig7.pdf [file NIHMS625382-supplement-ESM_Fig7.pdf]

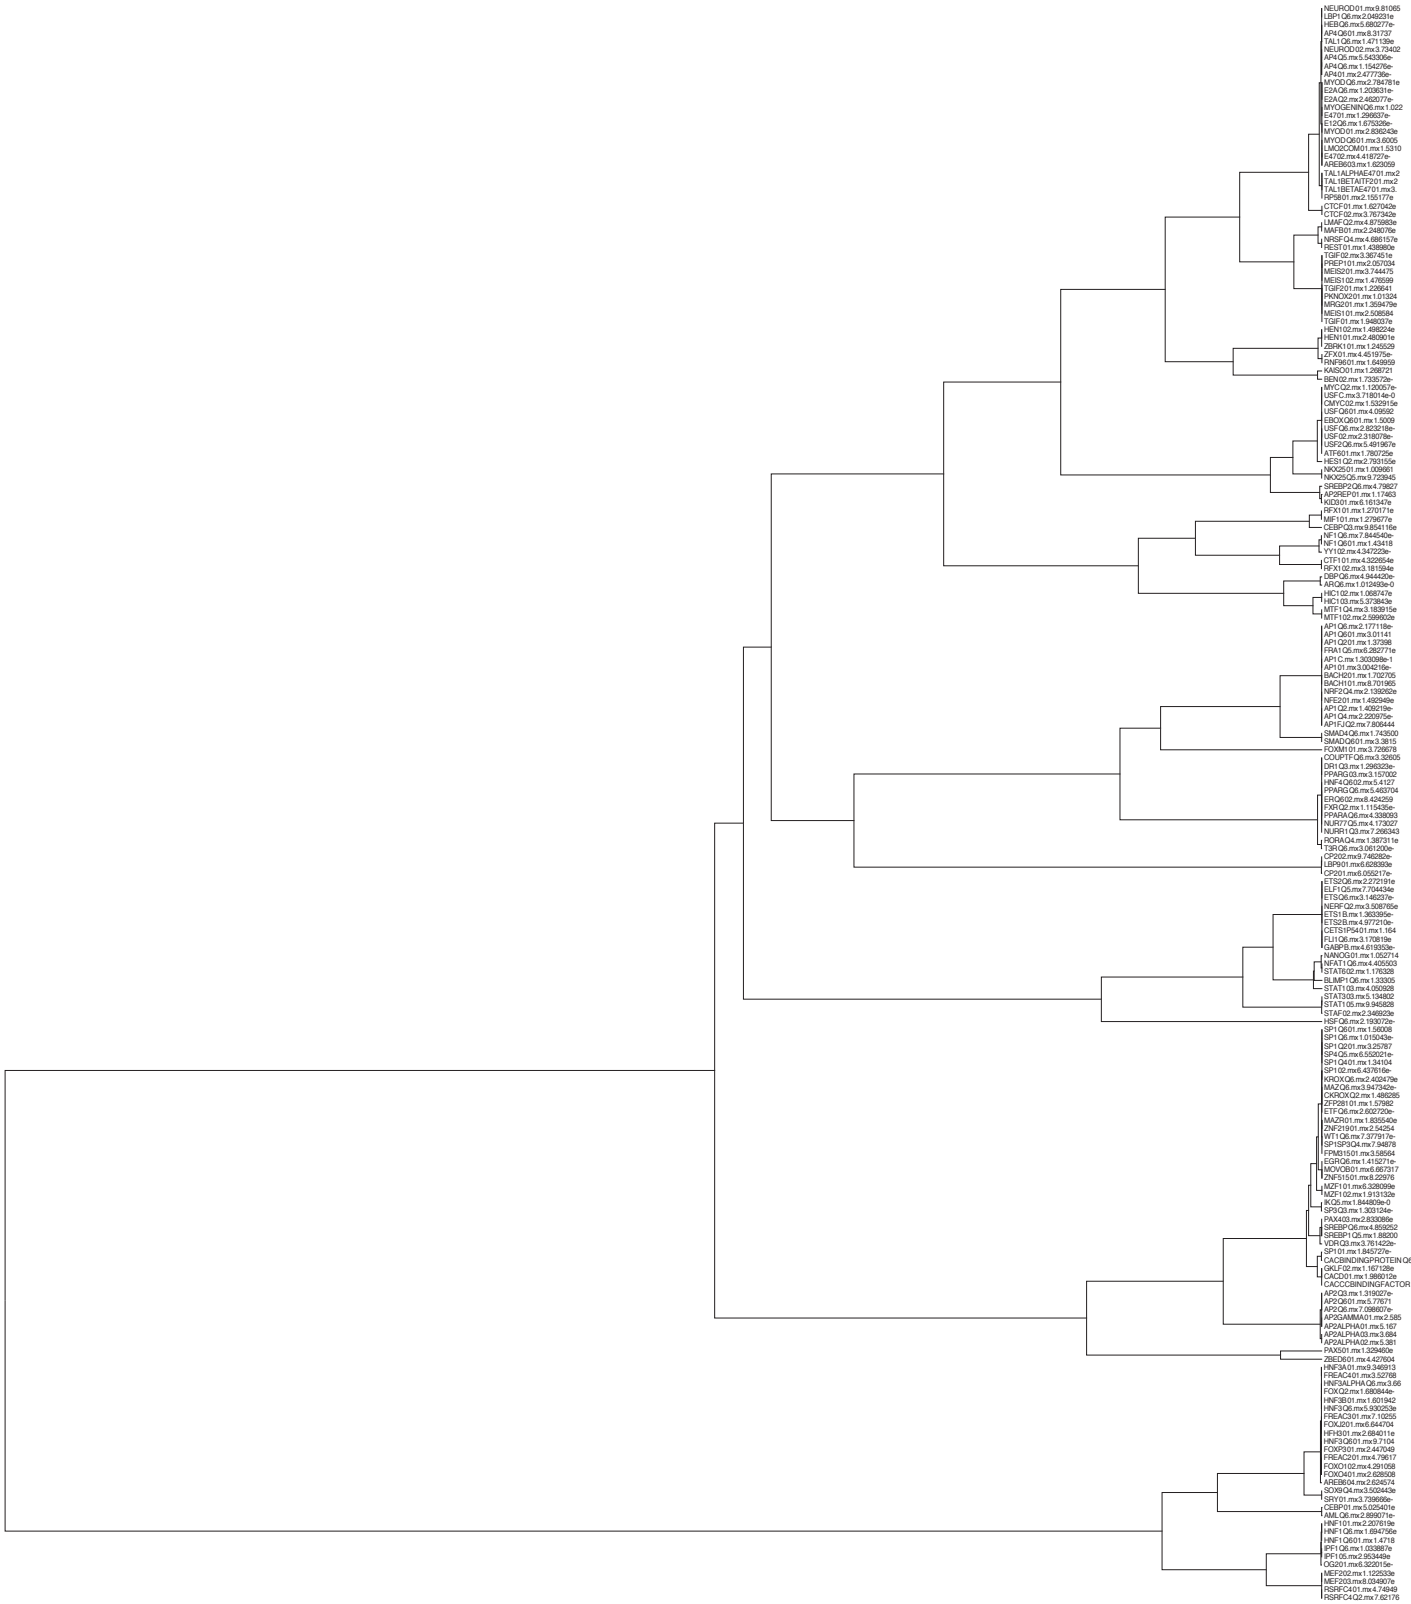

**ESM Fig. 7** Phylogram of transcription factor binding matrix similarities for NSE enriched motifs. Matrices of NSE enriched motifs were analysed using STAMP. Matrix similarities are represented by clustering into distinct families with horizontal line length indicating relative similarity between individual matrices and matrix families
